# Supplementary material for: Is Diversity the Missing Link in Coastal Fisheries Management?
Source: MDPI journal article supplement (doi:10.3390/d14020090), 2022-01-28
Supplement: s1 [file s1]

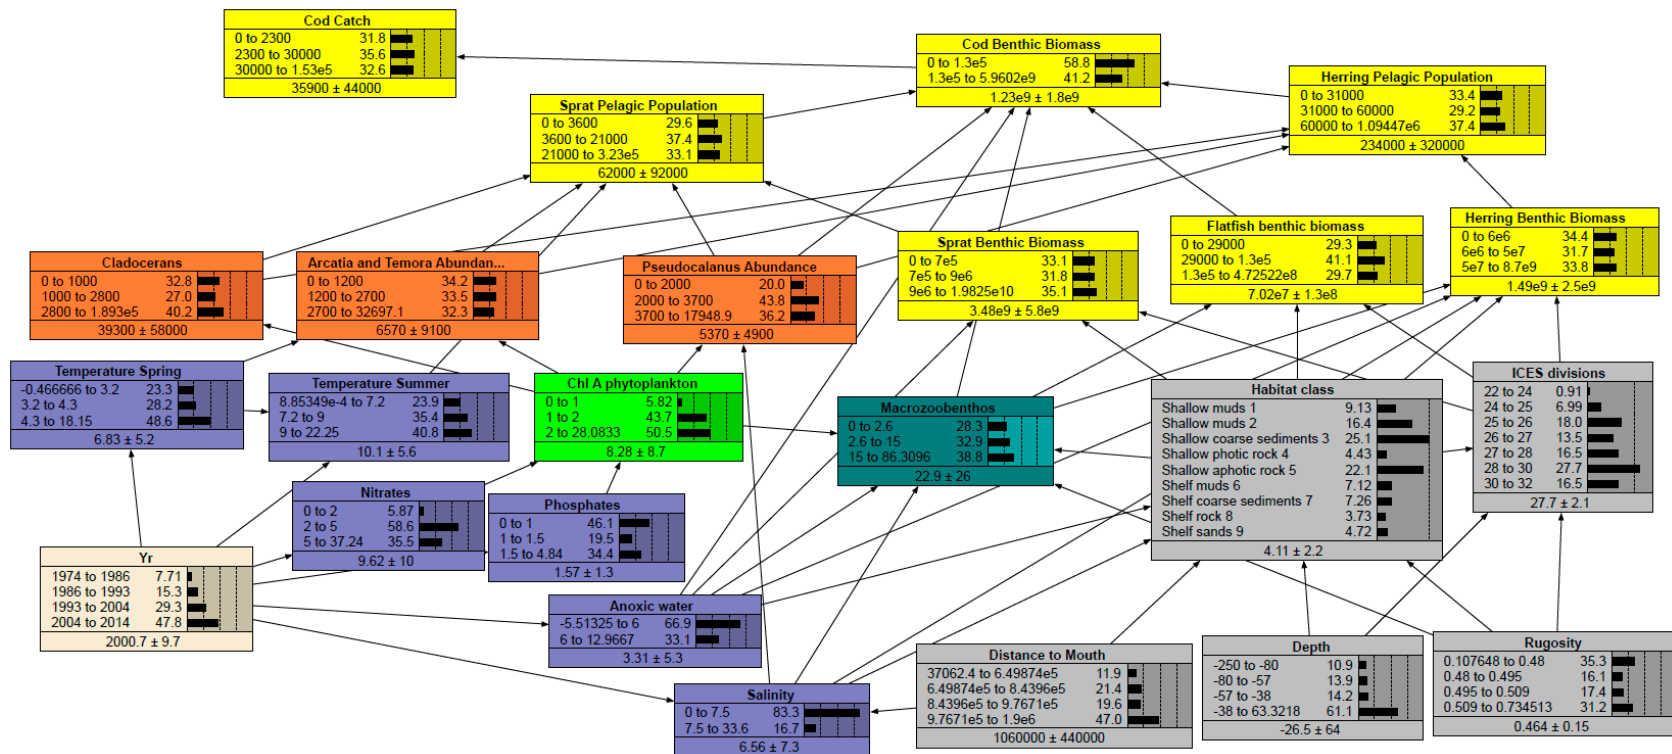

**Figure S1.** The completed BN with colors highlighting the structural (grey), environmental (purple), phytoplankton (light green), zooplankton (orange), macrozoobenthos (brown), fish (yellow), and time (beige) components. Each node (box) shows the discrete bins and marginal probabilities (as numbers and a bar graphic). Each arrow represents a modelled conditional probability element.
